# Supplementary material for: Combined Immunodeficiency Evolving into Predominant CD4+ Lymphopenia Caused by Somatic Chimerism in JAK3
Source: PubMed Central journal article supplement (PMC4220108; doi:10.1007/s10875-014-0088-2), 2014-09-10
Supplement: 10875_2014_88_MOESM1_ESM.pdf [file 10875_2014_88_MOESM1_ESM.pdf]

Supplementary Table 1: Impaired T cell activation in response to stimulation with mitogens, anti-CD3, superantigens and recall antigen in patient 1 (II-1)

A. Lymphoproliferative response (in dpm, 3H-thymidine incorporation)

|                         | healthy control | patient 1 (23m)    |
|-------------------------|-----------------|--------------------|
| PHA (1:1250)            | 27210           | 4109               |
| ConA (12 µg/ml)         | 1240            | 5510               |
| PWM (1:1000)            | 35999           | 2468               |
| anti-CD3/OKT3 (10ng/ml) | 11140           | 97                 |
| SE-A (50ng/ml)          | 71224           | 7086               |
| SE-B (50ng/ml)          | 68166           | 7937               |
| SE-E (50ng/ml)          | 78513           | 1800               |
| TSST-1 (50ng/ml)        | 33724           | 16091              |
| TTs (10LF/ml)           | 24507           | 73* <sup>1</sup> ) |

|              | healthy control | patient 1 (5y1m)     |
|--------------|-----------------|----------------------|
| Medium       | 429             | 91                   |
| PWM (1:1000) | 15777           | 12963                |
| TTs (4LF/ml) | 11516           | 6372* <sup>2</sup> ) |

\*<sup>1</sup>) patient 1 has been vaccinated four times with tetanus toxoid

\*<sup>2</sup>) measured following two booster vaccinations with tetanus toxoid

B. Interleukin-2 release (in pg/ml, ELISA, following 48hr-stimulation of PBMC)

|              | healthy control | patient 1 (5y1m) |
|--------------|-----------------|------------------|
| Medium       | 65              | 86               |
| PHA (1:1250) | 5385            | 186              |

C. Interferon-gamma release (in pg/ml, ELISA, following 72hr-stimulation of PBMC)

|              | healthy control | patient 1 (5y1m) |
|--------------|-----------------|------------------|
| Medium       | 21              | <11              |
| PHA (1:1250) | 62981           | 410              |

dpm, disintegrations per minute; PHA, Phytohaemagglutinin; ConA, Concanavalin A; PWM, Pokeweed-Mitogen; SE, staphylococcal enterotoxin; TSST, toxic shock syndrome toxin; TTs, soluble tetanus toxoid; LF, LF-units (limit of flocculation units)
