# Supplementary material for: Combined Immunodeficiency Evolving into Predominant CD4+ Lymphopenia Caused by Somatic Chimerism in JAK3
Source: PubMed Central journal article supplement (PMC4220108; doi:10.1007/s10875-014-0088-2), 2014-09-10
Supplement: 10875_2014_88_MOESM2_ESM.pdf [file 10875_2014_88_MOESM2_ESM.pdf]

Supplementary Table 2: Antibody response following vaccination with bacterial polysaccharide antigen

| Patient 1 (II - 1)        |     |     |       |        |                     |       |                     |       |                     |     |     |       |
|---------------------------|-----|-----|-------|--------|---------------------|-------|---------------------|-------|---------------------|-----|-----|-------|
| Age                       | 20m | 26m | 4y 9m | 4y 11m |                     | 5y 1m |                     | 7y 8m |                     | 8y  | 9y  | 9y 3m |
| Pn23-IgG * <sup>1</sup> ) | <20 | <20 | 64    | 64     | Vac* <sup>3</sup> ) | 33    | Vac* <sup>3</sup> ) | 54    | Vac* <sup>3</sup> ) | 81  | 47  | 41    |
| Pn23-IgM * <sup>2</sup> ) | 198 | 185 | 357   | 384    | Vac* <sup>3</sup> ) | 347   | Vac* <sup>3</sup> ) | 609   | Vac* <sup>3</sup> ) | 393 | 459 | 860   |

  

| Patient 2 (II - 2)        |  |       |                     |       |     |     |                     |       |       |       |        |        |
|---------------------------|--|-------|---------------------|-------|-----|-----|---------------------|-------|-------|-------|--------|--------|
| Age                       |  | 3y 2m |                     | 3y 6m | 5y  | 6y  |                     | 7y 5m | 8y 2m | 9y 2m | 10y 2m | 11y 2m |
| Pn23-IgG * <sup>1</sup> ) |  | <20   | Vac* <sup>3</sup> ) | 399   | 105 | 37  | Vac* <sup>3</sup> ) | 316   | 249   | 120   | 185    | 159    |
| Pn23-IgM * <sup>2</sup> ) |  | 414   | Vac* <sup>3</sup> ) | 1129  | 508 | 340 | Vac* <sup>3</sup> ) | 636   | 999   | 365   | 376    | 413    |

values represent reciprocal serum titer of IgG and IgM antibodies determined by ELISA

\*<sup>1</sup>) normal range in healthy Pn23-vaccinated controls is  $\geq 200$

\*<sup>2</sup>) normal range in healthy Pn23-vaccinated controls is  $\geq 100$

\*<sup>3</sup>) Vaccination against Pn23

Pn23, 23-valent pneumococcal polysaccharide vaccine; y, years; m, months
