# Supplementary material for: Combined Immunodeficiency Evolving into Predominant CD4+ Lymphopenia Caused by Somatic Chimerism in JAK3
Source: PubMed Central journal article supplement (PMC4220108; doi:10.1007/s10875-014-0088-2), 2014-09-10
Supplement: 10875_2014_88_MOESM3_ESM.pdf [file 10875_2014_88_MOESM3_ESM.pdf]

a. Patient 1 (II - 1) Percentage cell count

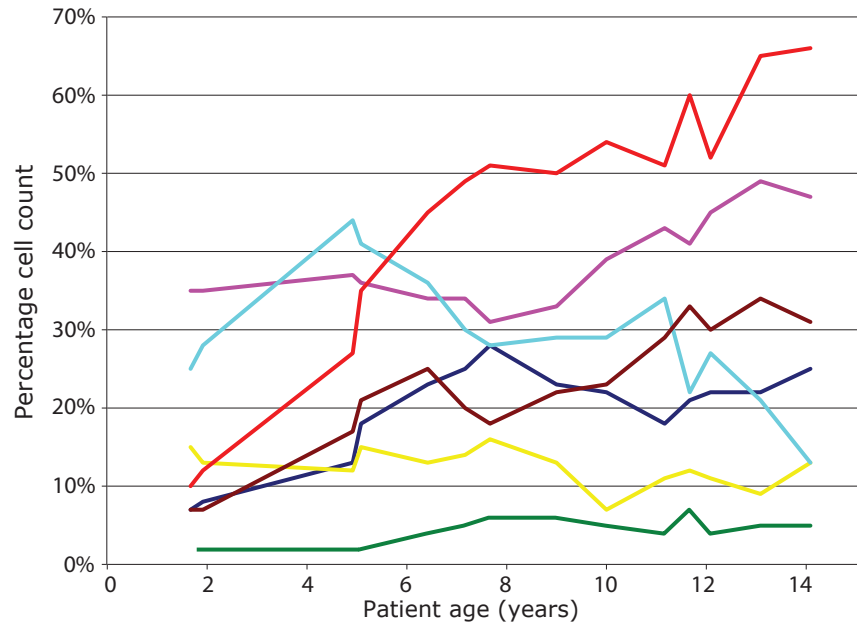

b. Patient 2 (II - 2) Percentage cell count

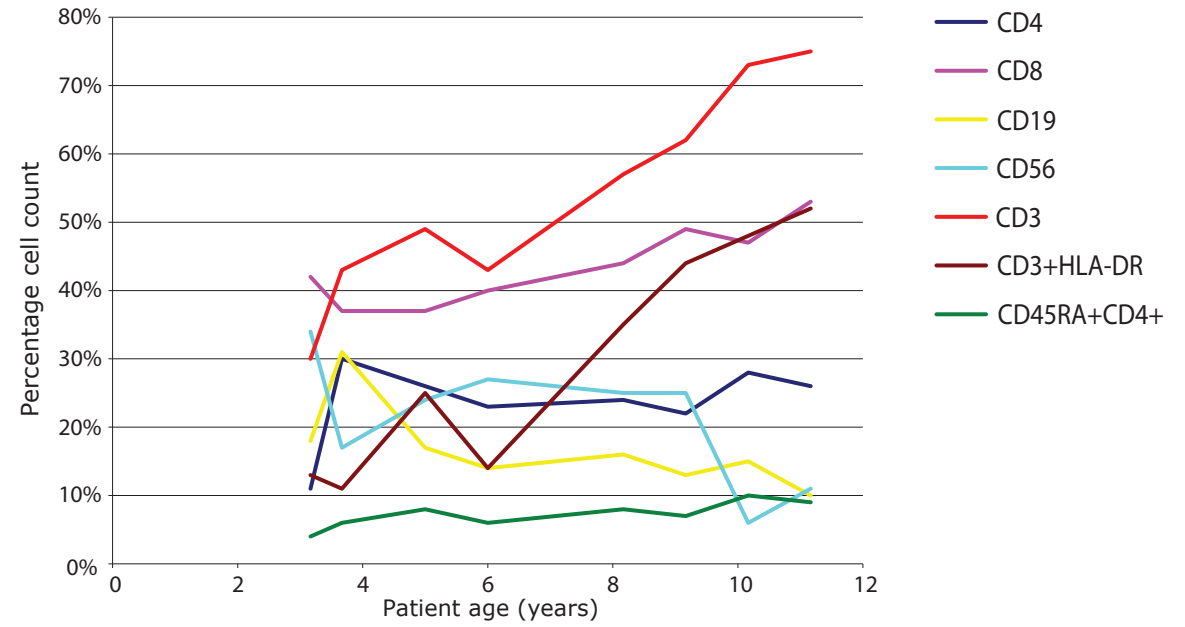

c. Patient 1 (II - 1) Total cell count per mm<sup>3</sup>

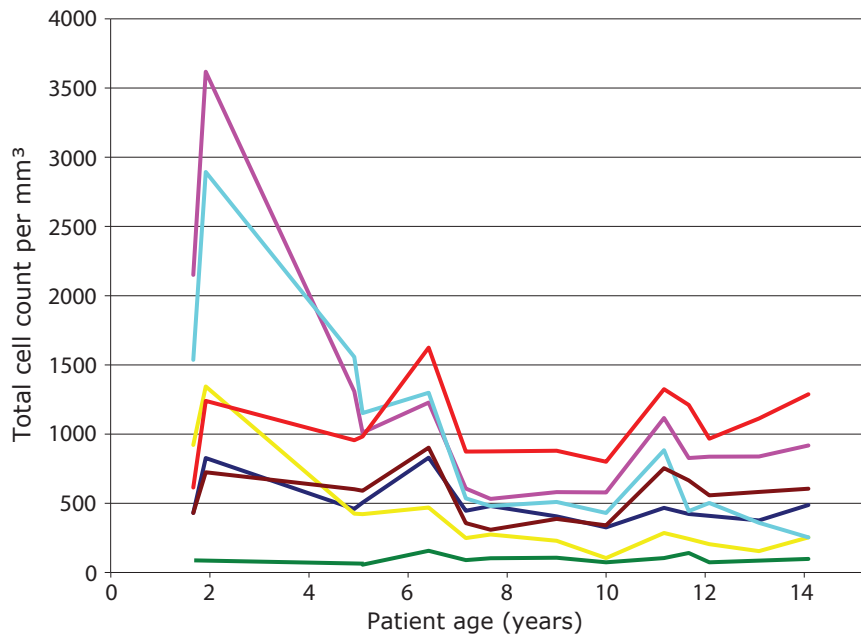

d. Patient 2 (II - 2) Total cell count per mm<sup>3</sup>

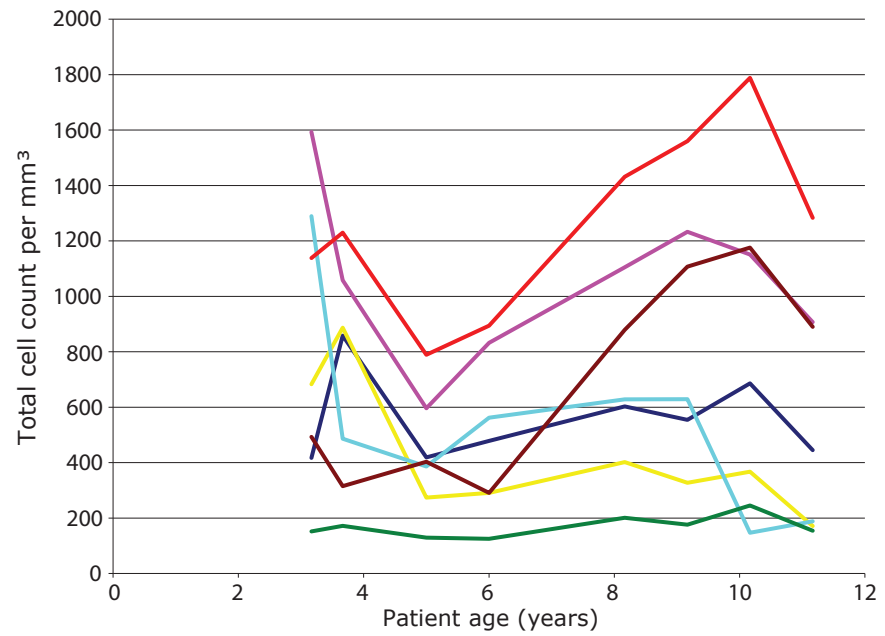

Supplementary Fig 1 Longitudinal follow-up of the immunological phenotype in both patients
