# Supplementary material for: Combined Immunodeficiency Evolving into Predominant CD4+ Lymphopenia Caused by Somatic Chimerism in JAK3
Source: PubMed Central journal article supplement (PMC4220108; doi:10.1007/s10875-014-0088-2), 2014-09-10
Supplement: 10875_2014_88_MOESM4_ESM.pdf [file 10875_2014_88_MOESM4_ESM.pdf]

Healthy  
Control

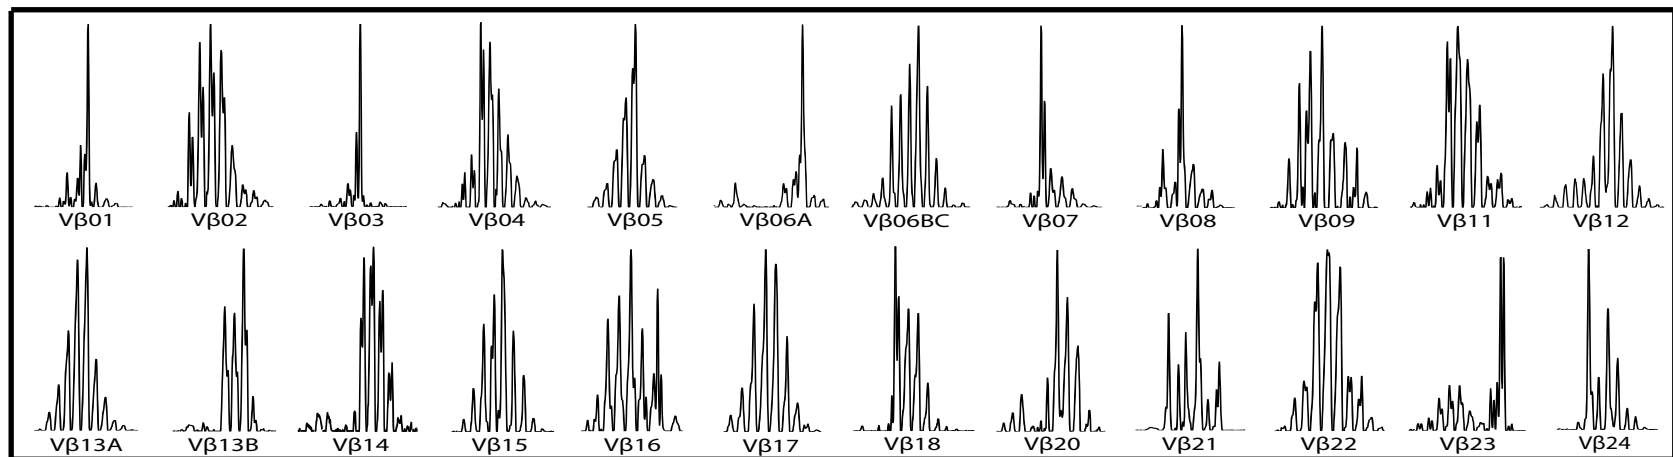

Patient 1  
II - 1

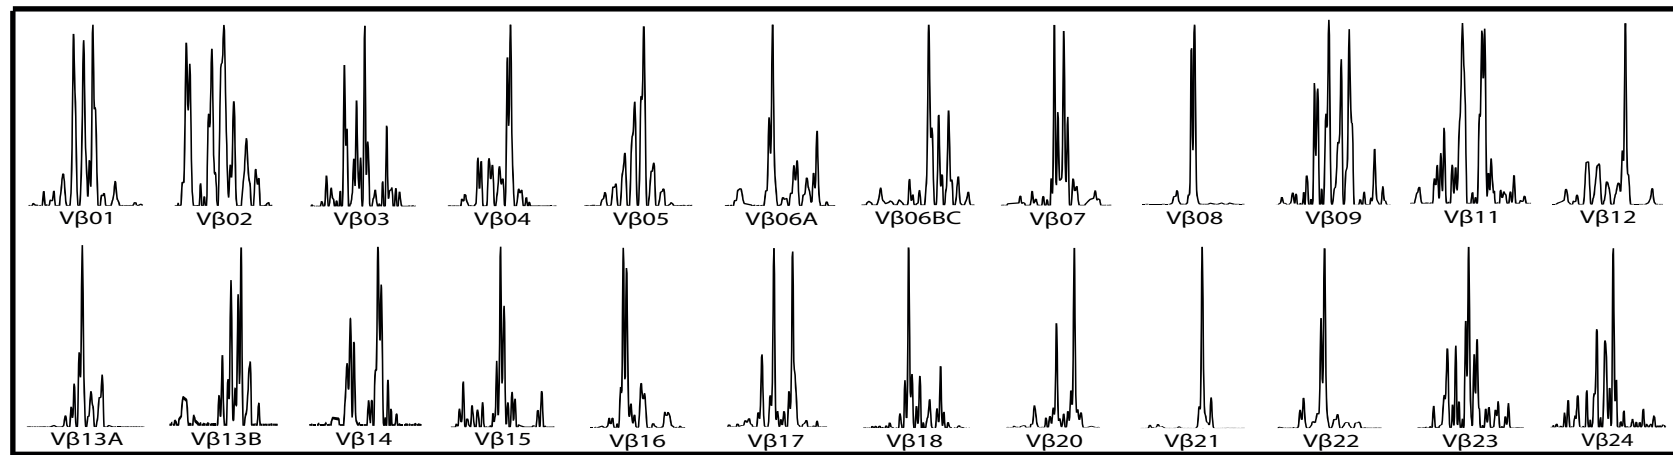

Patient 2  
II - 2

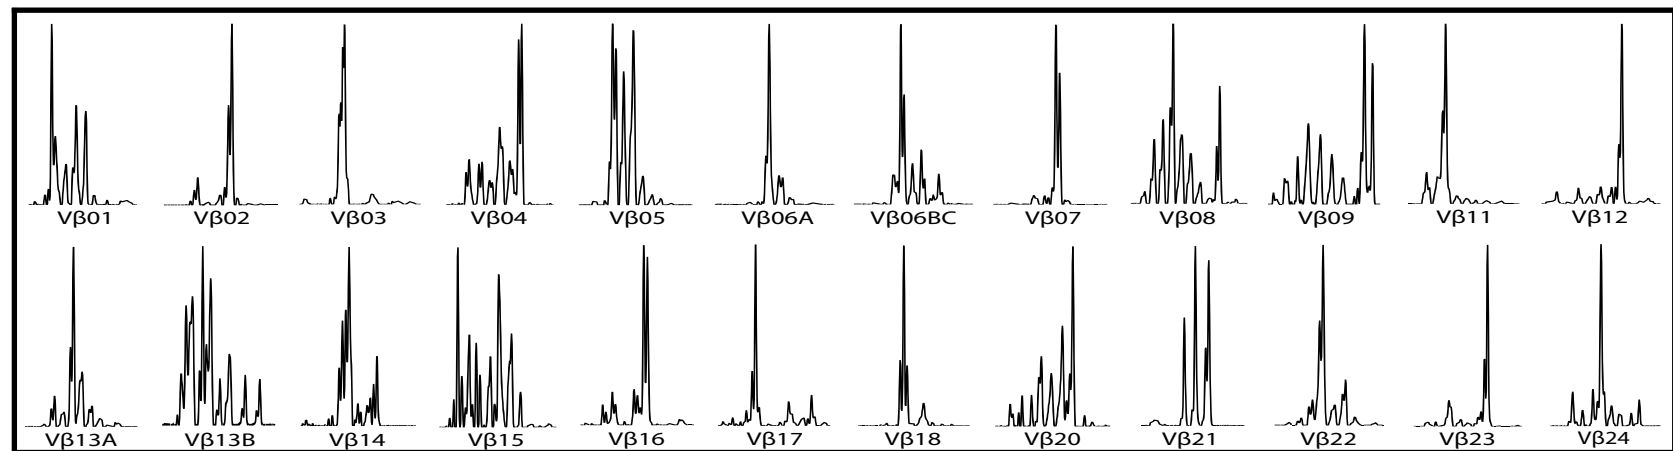

Supplementary Fig 2  $V\beta$  TCR spectratyping of patient 1 (II-1), patient 2 (II-2) and a healthy control
