# Supplementary material for: Combined Immunodeficiency Evolving into Predominant CD4+ Lymphopenia Caused by Somatic Chimerism in JAK3
Source: PubMed Central journal article supplement (PMC4220108; doi:10.1007/s10875-014-0088-2), 2014-09-10
Supplement: 10875_2014_88_MOESM5_ESM.pdf [file 10875_2014_88_MOESM5_ESM.pdf]

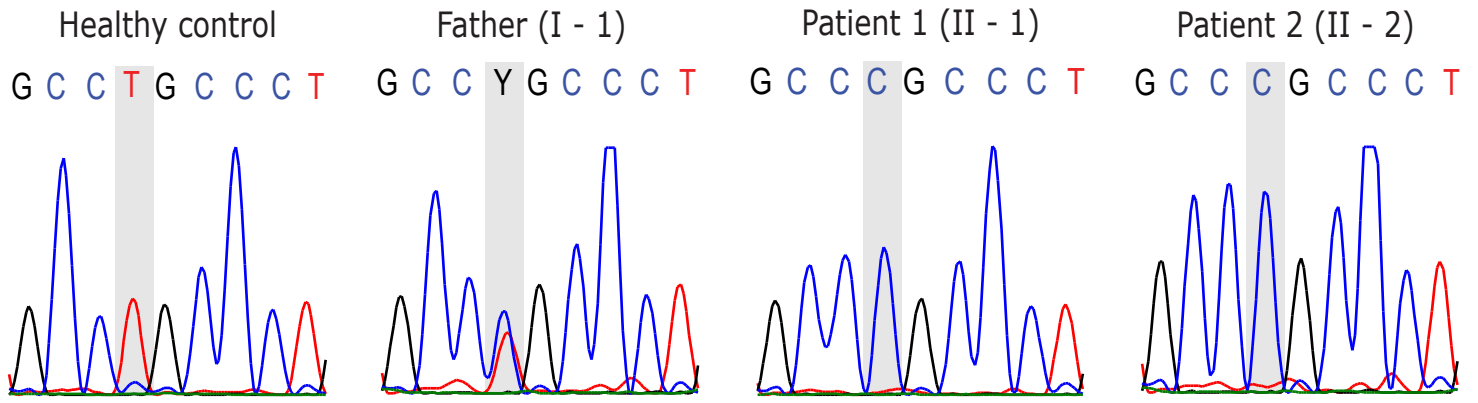

Supplementary Fig 3 Sequencing of exon 23 of the JAK 3 gene in genomic DNA derived from EBV- transformed B-cells from both index patients (II-1, II-2), their father and a healthy control. The mutation site of interest is highlighted in gray background.
